# Supplementary material for: The Enhanced Durability of AgCu Nanoparticle Coatings for Antibacterial Nonwoven Air Conditioner Filters
Source: MDPI journal article supplement (doi:10.3390/molecules28145446), 2023-07-16
Supplement: s1 [file s1]

*S. aureus*

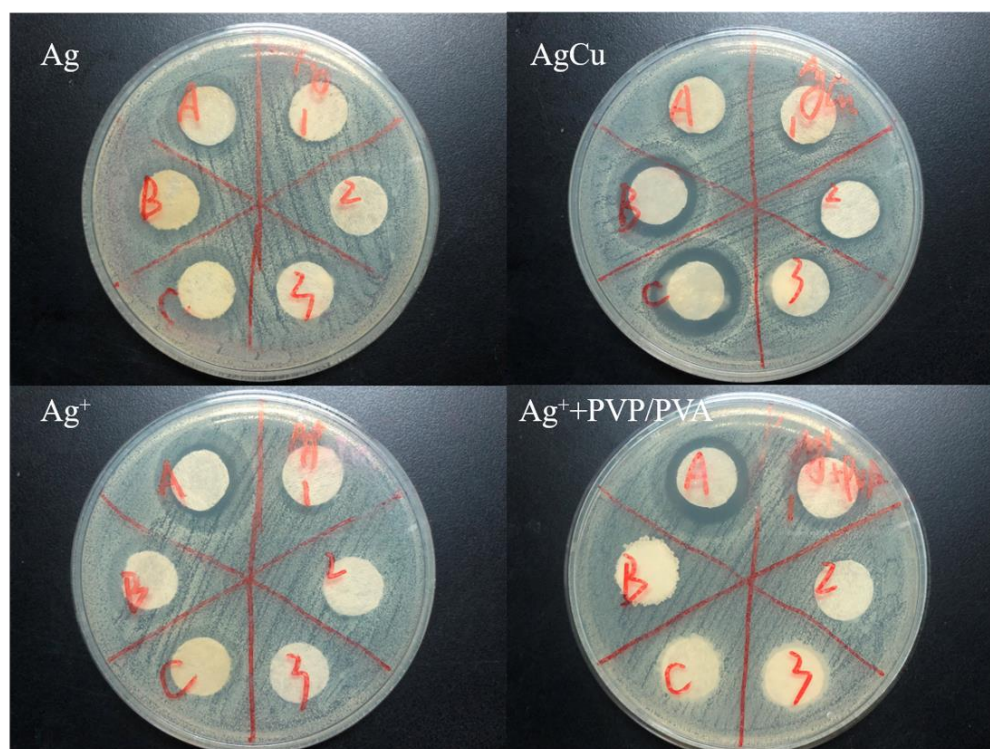

**Figure S1.** A comparison of Zone of Inhibition of *S. aureus* on Ag-nonwoven fabrics with different pretreatment: A, B, C were wet with 50 microliters of deionized water while 1, 2, 3 were not, before antibacterial evaluation, in the order of as prepared (A, 1), two-week (B, 2) and four-week (C, 3).

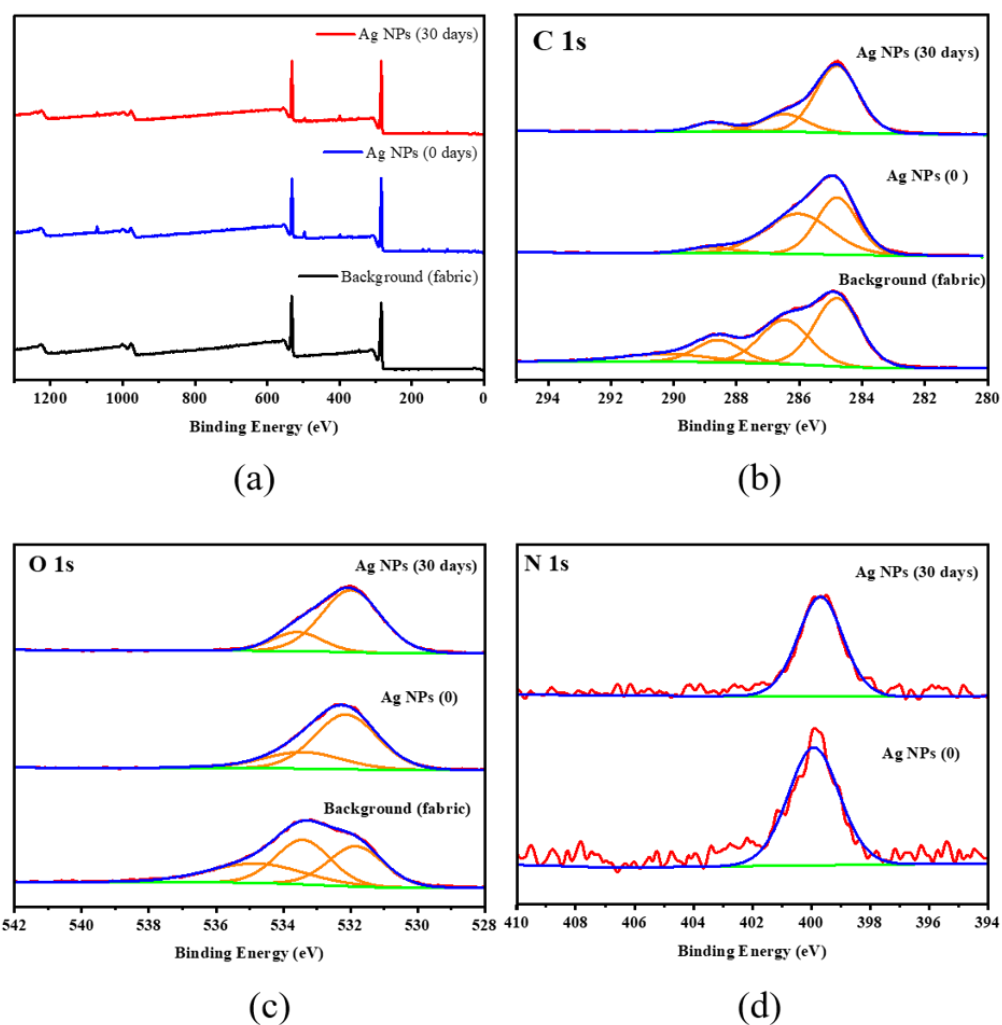

**Figure S2.** XPS of Ag NPs coated nonwoven fabrics. (a) Survey, (b) C1s, (c) O1s. (d) N1s.

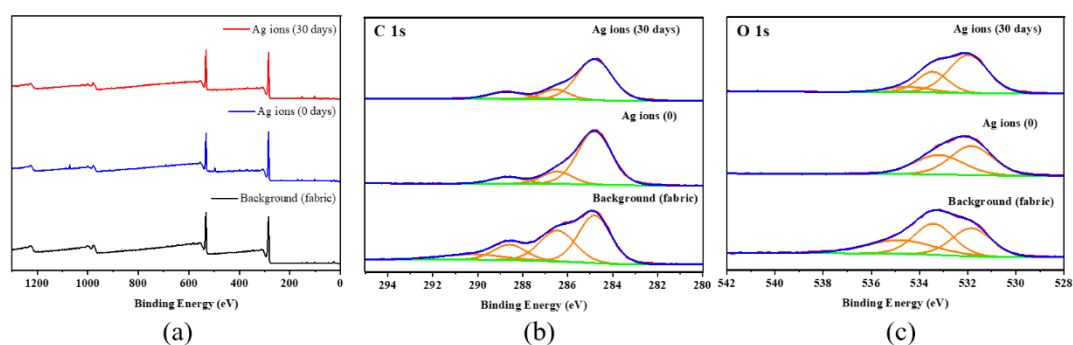

**Figure S3.** XPS of Ag ion-coated nonwoven fabrics. (a) Survey, (b) C1s, (c) O1s.

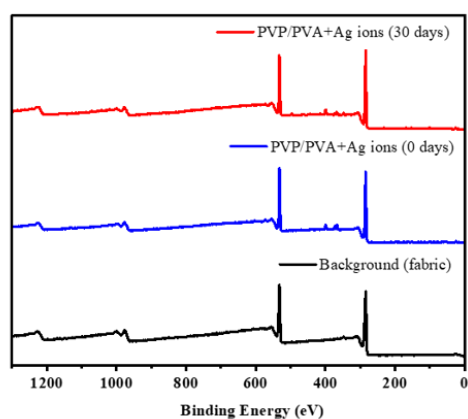

(a)

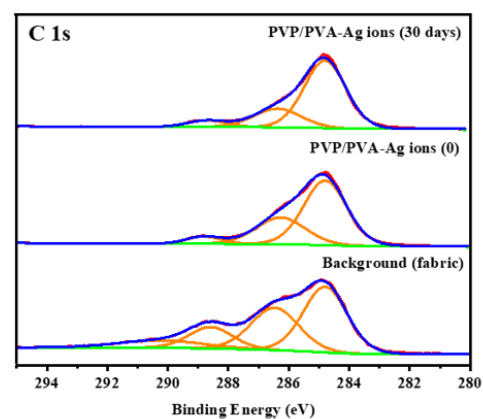

(b)

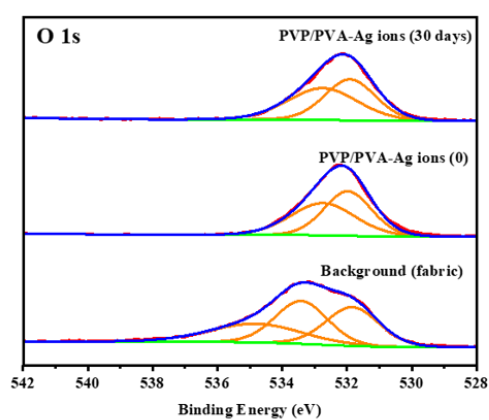

(c)

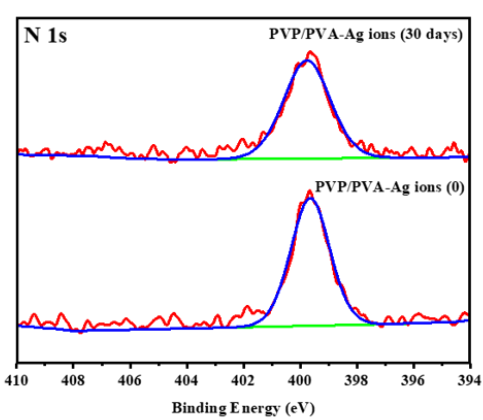

(d)

**Figure S4.** XPS of PVP/PVA + Ag ion-coated nonwoven fabrics. (a) Survey, (b) C1s, (c) O1s. (d) N1s.

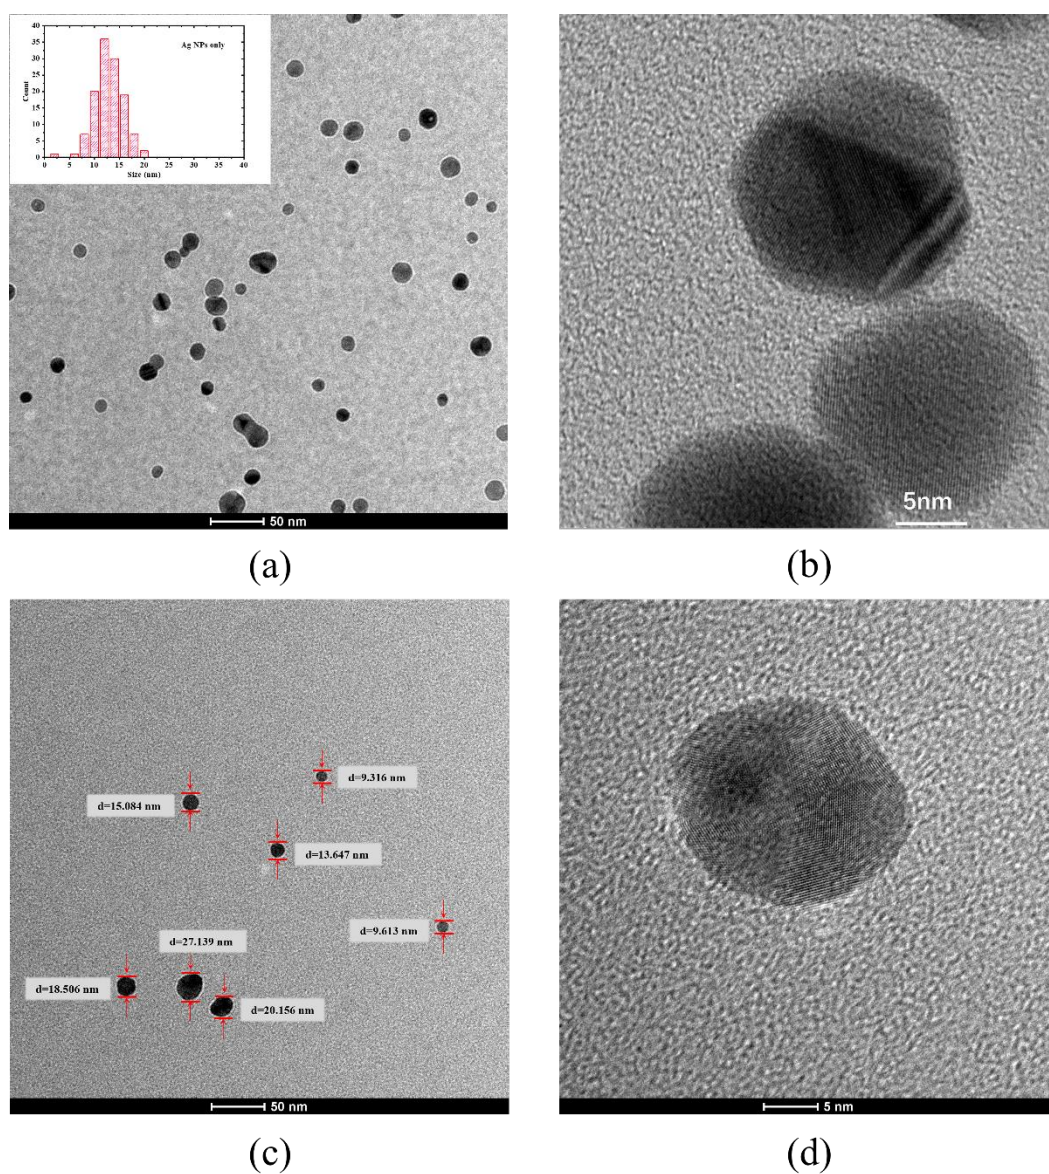

**Figure S5.** TEM photographs of Ag NPs at (a) low magnification, (b) high magnification; (c) Measured particle size and (d) high-magnification photo of AgCu NPs.
